# Supplementary material
Source: PubMed Central journal article supplement (PMC3306715)
Supplement: 1117783109_pnas.1117783109_SI.pdf [file 1117783109_pnas.1117783109_SI.pdf]

# Supporting Information

Dalal et al. 10.1073/pnas.1117783109

## SI Materials and Methods

**Cloning of pBAD22-HisEY<sub>FF</sub>-YG and pBAD22-HisEY<sub>FF</sub>-Y<sub>E</sub>G.** To express two different SecY complexes from the same plasmid, a second *secY* gene together with an identical ribosome binding site were introduced into plasmid pBAD22-HisEYG, in-between *secY* and *secG*. Briefly, the restriction site *SacI* and *XbaI* were inserted by site-directed mutagenesis at the 3' end of *secY* and 5' end of *secG*, respectively. Next, a second *secY* flanked by a ribosome binding sequence was generated by PCR amplification and inserted in-between *SacI* and *XbaI*. The resulting plasmids pBAD22-HisEY<sub>FF</sub>-YG and pBAD22-HisEY<sub>FF</sub>-Y<sub>E</sub>G were verified by sequencing analysis and restriction mapping.

**Reconstitution of SecY or SecY-Fused Dimers into Nanodiscs.** Reconstitution of the SecY complex into MSP1 was performed as previously described (1, 2) at a molecular ratio SecYEG:MSP1:lipids of 1:5:40. Reconstitutions of the SecYEG dimer into MSP3 were performed at a molecular ratio of 1:3:20. The covalently linked SecYEG dimer (SecYY; 3) was reconstituted into MSP3 or MSP2N2 at a molecular ratio of 1:5:40. Nanodiscs containing only phosphatidylglycerol (PG) or *Escherichia coli* lipids were prepared at a molecular ratio of MSP3:lipids of 1:20.

1. Alami M, Dalal K, Lelj-Garolla B, Sligar SG, Duong F (2007) Nanodiscs unravel the interaction between the SecYEG channel and its cytosolic partner SecA. *EMBO J* 26:1995–2004.

Purification of the reconstituted discs was by gel-filtration chromatography on a Superdex 200 HR10/30 column equilibrated in 50 mM Tris-HCl pH 7.9, 100 mM NaCl, 5% glycerol (TSG buffer).

**Sucrose Density Purification of Nanodiscs.** Sucrose density purification of SecY fusion complexes in MSP2N2 was performed by layering the nanodisc preparation on top of a 10 mL sucrose gradient (6–13% in TSG buffer), followed by centrifugation at  $188,000 \times g$  in a Beckmann SW41 rotor (17 h, 4 °C). Fractions (0.5 mL) were collected top-down and analyzed by native-PAGE (see Fig. S7).

**Labeling of PhoA1-202 with Fluorescent Dye.** Dye-labeling of PhoA1-202 (100  $\mu$ g) was performed by incubation with Alexa Fluor 680 (40 ng/ $\mu$ L; Invitrogen Molecular Probes) in 50 mM Tris-HCl pH 7.9, 6 M urea, 1 mM EDTA, and 5  $\mu$ M Tris(2-carboxyethyl) phosphine buffer for 2 h at room temperature. The reaction was quenched with 1 mM DTT, and excess dye was removed by gel-filtration chromatography in 50 mM Tris-HCl pH 7.9, 5 M urea, and 1 mM DTT.

2. Dalal K, Duong F (2010) Reconstitution of the SecY translocon in nanodiscs. *Methods Mol Biol* 619:145–156.

3. Duong F (2003) Binding, activation and dissociation of the dimeric SecA ATPase at the dimeric SecYEG translocase. *EMBO J* 22:4375–4384.

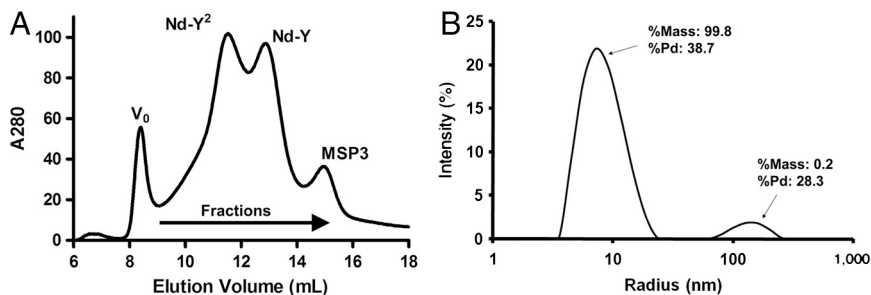

**Fig. S1.** Example of gel-filtration analysis of the SecY complex reconstituted in nanodiscs. (A) The SecY complex reconstituted with MSP3 [ $\sim 500 \mu$ g, dioleoyl-phosphatidylglycerol (DOPG) lipids] was separated by size-exclusion chromatography on a Superdex 200 HR10/30. (B) Dynamic light scattering analysis of a purified SecY dimer in nanodiscs (i.e., fraction 7 shown in Fig. 2B). The mass fraction (%Mass) and polydispersity (%Pd) is indicated above each peak.







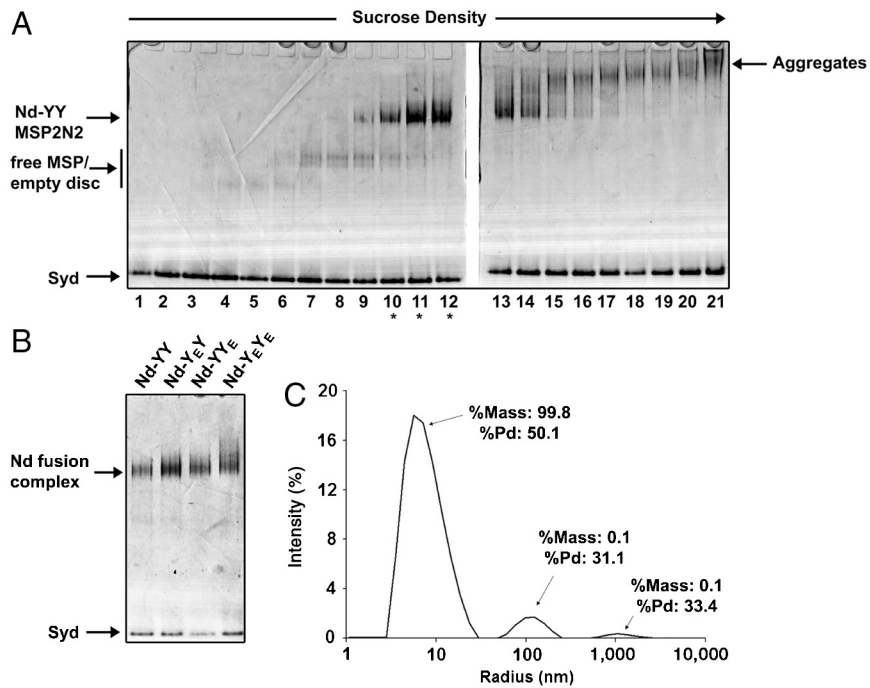

**Fig. S7.** Purification of the Nanodisc-SecY dimer by sucrose gradient centrifugation. (A) The covalently linked SecY dimer reconstituted with the MSP2N2 scaffold protein and PG lipids was loaded on top of a 6–13% sucrose gradient. After centrifugation ( $188,000 \times g$ , 17 h, 4 °C), equal fractions were collected and analyzed by native-PAGE in the presence of Syd. Translocation ATPase measurements in Fig. 3D were performed on the fractions labeled with an asterisk. The fused SecY dimer supported the highest translocation ATPase when reconstituted with the MSP2N2 scaffold protein. (B) Nanodiscs bearing the indicated SecY mutants were purified as in A. (C) Assessment of the purity of the Nd-YY complex by dynamic light scattering. The trace shows that the nanodisc complex (~8 nm radius) is 99.8% pure from any liposomes (50–100 nm) or large aggregates (>100 nm).

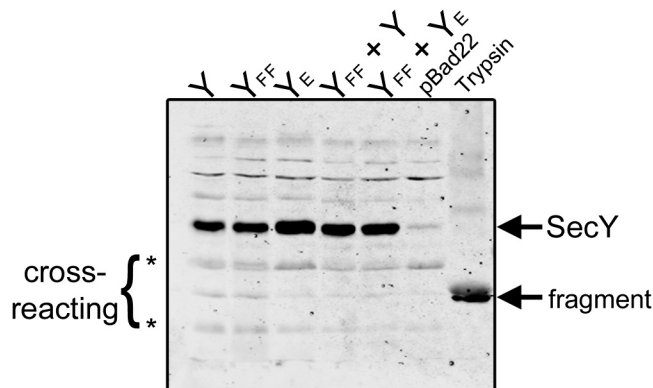

**Fig. S8.** Analysis of the IMVs (~3  $\mu$ g) employed in the translocation experiments described in Fig. 6 C and D. Immuno-detection was using a polyclonal antibody directed against SecY. The large cytoplasmic loop of SecY is sensitive to proteolysis. On the right lane, the detergent purified SecYEG complex (1  $\mu$ g) was incubated with trypsin (~300 ng for 15 min at 4 °C), followed by precipitation with 17% trichloroacetic acid prior to loading on the gel. This band is absent from IMVs. The bands labeled with an asterisk are cross-reacting proteins with the SecY antibody.
